# Supplementary material
Source: publisher figshare collection journal article supplement (https://sage.figshare.com/ndownloader/files/14150294)
Supplement: Supplementary file 1 [file 14150294]

Table S1. Drugs analysed in oral fluid samples and cut-off concentrations.

| **Substance** | **Analytical cutoff in**  **oral fluid-buffer-methanol mixture (ng/mL)** | **Corresponding cut-off in neat oral fluida**  **(ng/mL)** |
| --- | --- | --- |
| ***Illegal substances*** |  |  |
| *Cannabis* |  |  |
| Tetrahydrocannabinol | 0.047 | 0.37 |
| *Central stimulants* |  |  |
| Amphetamine | 1.8 | 15 |
| Benzoylecgonineb | 0.54 | 4.3 |
| Cocaine | 0.14 | 1.1 |
| MDMA (ecstasy) | 0.29 | 2.3 |
| Methamphetamine | 1.1 | 8.9 |
| *Illicit opiate* |  |  |
| 6-monoacetylmorfin | 0.59 | 4.7 |
| *Hallucinogen* |  |  |
| LSD | 0.0024 | 0.019 |
| *NPS* |  |  |
| 25C-MBOMe | 0.0060 | 0.048 |
| 25I-NBOMe | 0.0077 | 0.062 |
| 2C-B | 0.029 | 0.23 |
| 2C-I | 0.035 | 0.28 |
| 4-methylamphetamine | 0.067 | 0.54 |
| 5F-APINACA | 0.012 | 0.093 |
| 5F-PB-22 | 0.011 | 0.091 |
| Alpha-PVP | 0.016 | 0.13 |
| AM-2201 | 0.011 | 0.087 |
| Diclazepam | 0.024 | 0.19 |
| Dimethyltryptamine | 0.013 | 0.11 |
| Etizolam | 0.027 | 0.22 |
| Ethylphenidate | 0.019 | 0.15 |
| Flubromazepam | 0.025 | 0.20 |
| Flubromazolam | 0.028 | 0.22 |
| Ketamine | 0.043 | 0.34 |
| Methylenedioxypyrovalerone | 0.062 | 0.50 |
| Mephedrone | 0.013 | 0.11 |
| Methiopropamine | 0.011 | 0.087 |
| Salvinorin A | 0.39 | 3.1 |
| THJ-2201 | 0.011 | 0.087 |
| UR-144 | 0.0094 | 0.075 |

aFor the expected volume of collected oral fluid of 0.4 mL. bMetabolites.
